# Supplementary material for: Identical sets of methylated and nonmethylated genes in Ciona intestinalis sperm and muscle cells
Source: PubMed Central journal article supplement (PMC3827831; doi:10.1186/1756-8935-6-38), 2013-11-11

Figure S1.

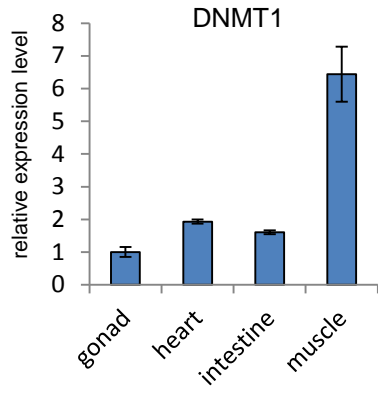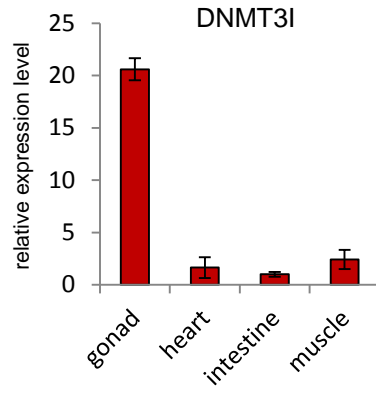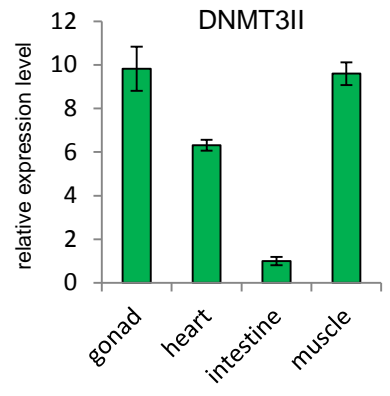

Figure S2.

| locus | Number of CpGs | Number of unmethylated CPGs | Input<br>affinity<br>purified |
|-------|----------------|-----------------------------|-------------------------------|
| MD2   | 8              | 0                           |                               |
| MD4   | 13             | 0                           |                               |
| MD1   | 18             | 0                           |                               |
| MD3   | 22             | 0                           |                               |
| UMD6  | 13             | 13                          |                               |
| UMD4  | 21             | 21                          |                               |
| UMD7  | 32             | 32                          |                               |
| UMD3  | 38             | 38                          |                               |

Figure S3.

**A**

KHC4:3,319,475 - 3,359,475

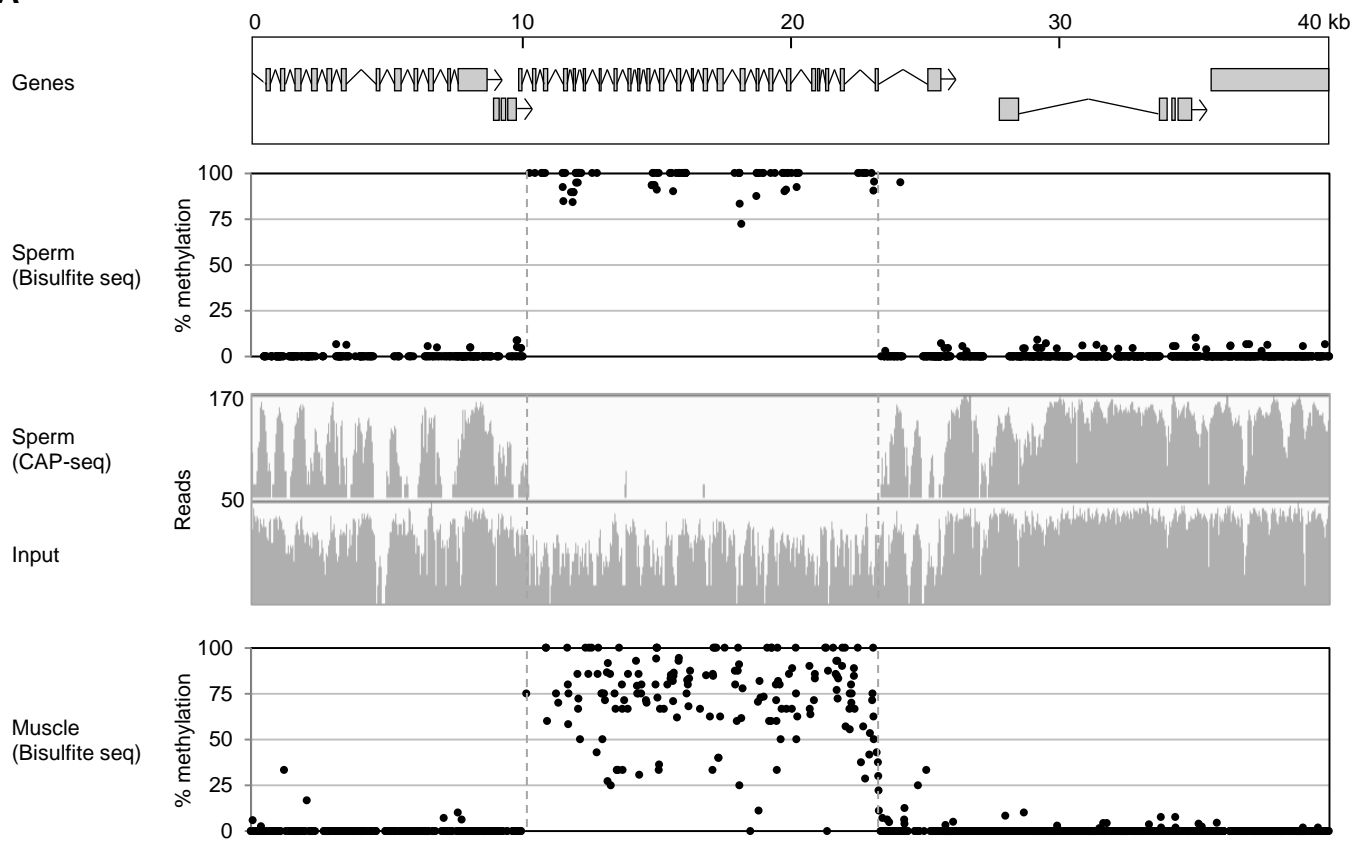

**B**

KHC7:463,000 - 493,000

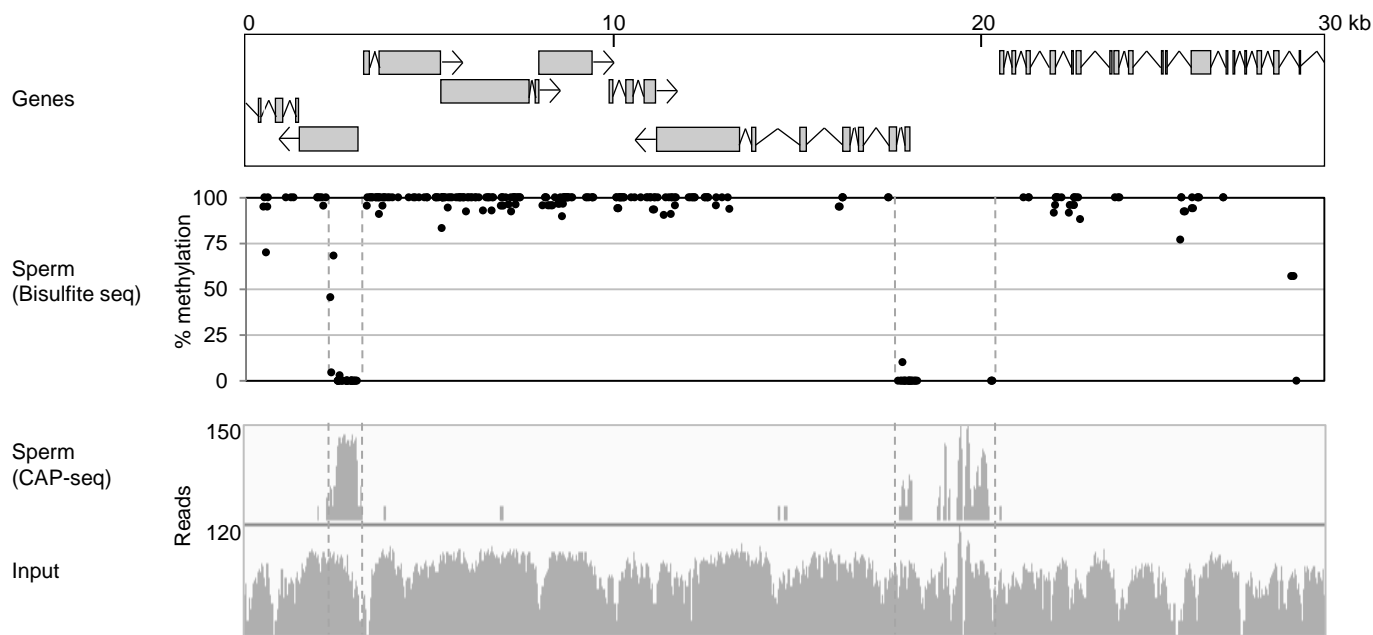

Figure S3.

**C**

KHC9:4,817,000 – 4,822,000

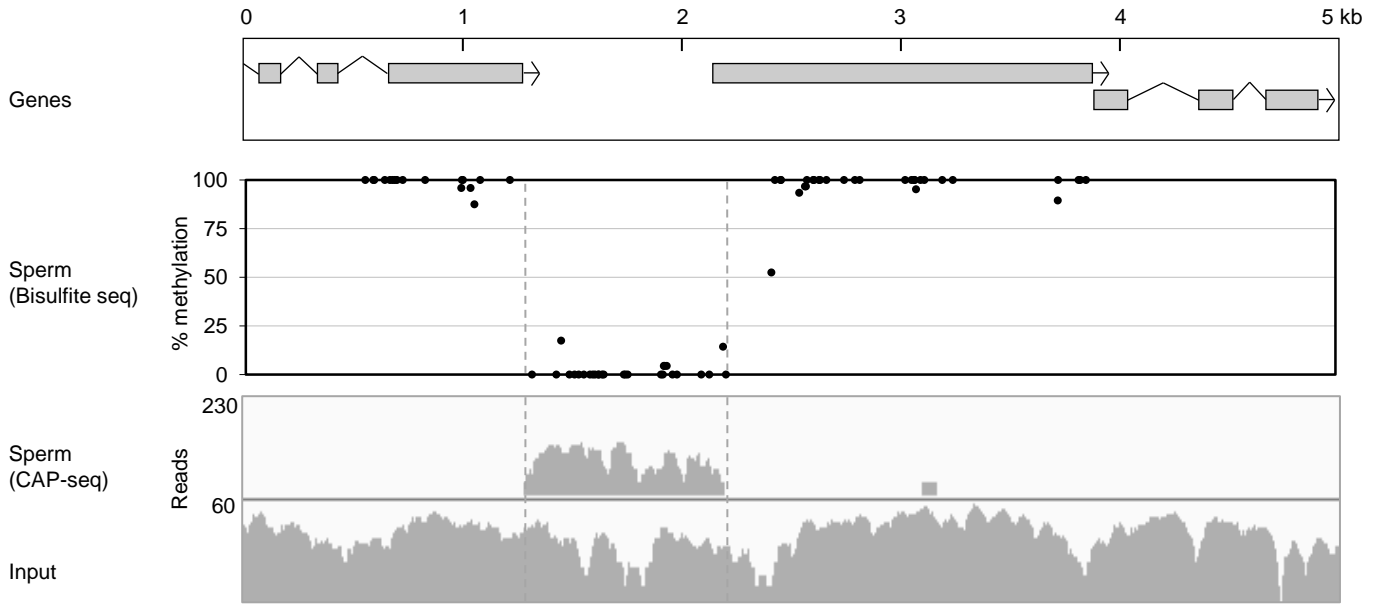

**D**

KHL40:74,750 – 76,750

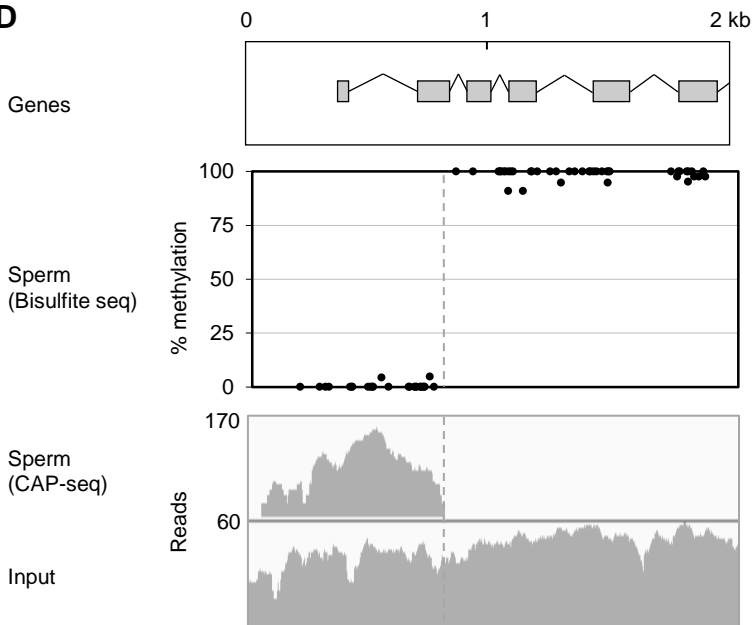

Figure S4.

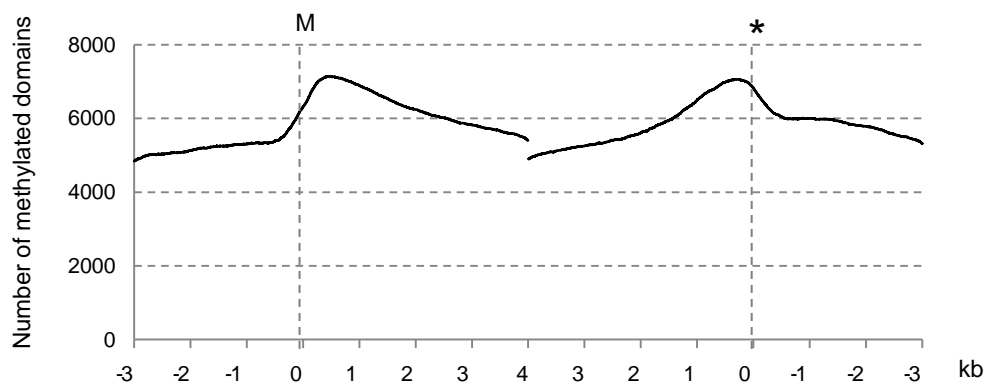

Figure S5.

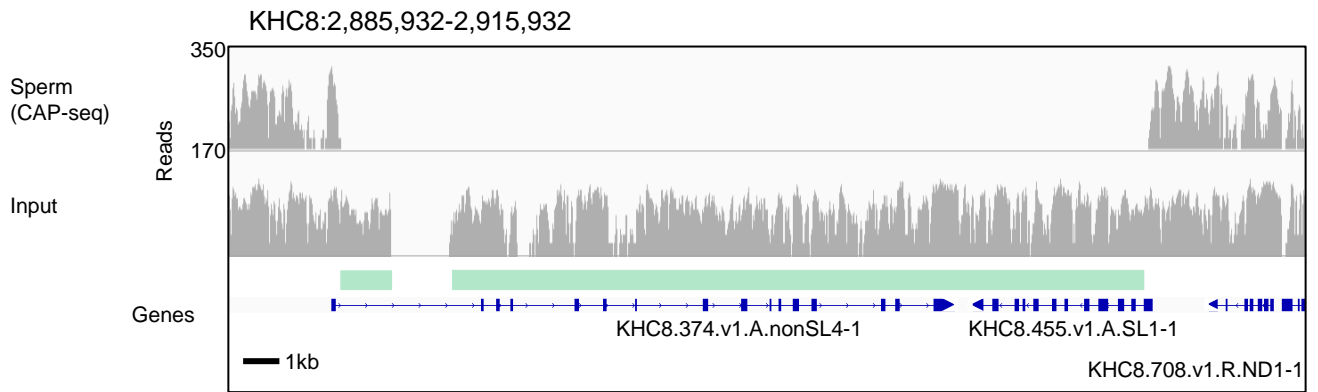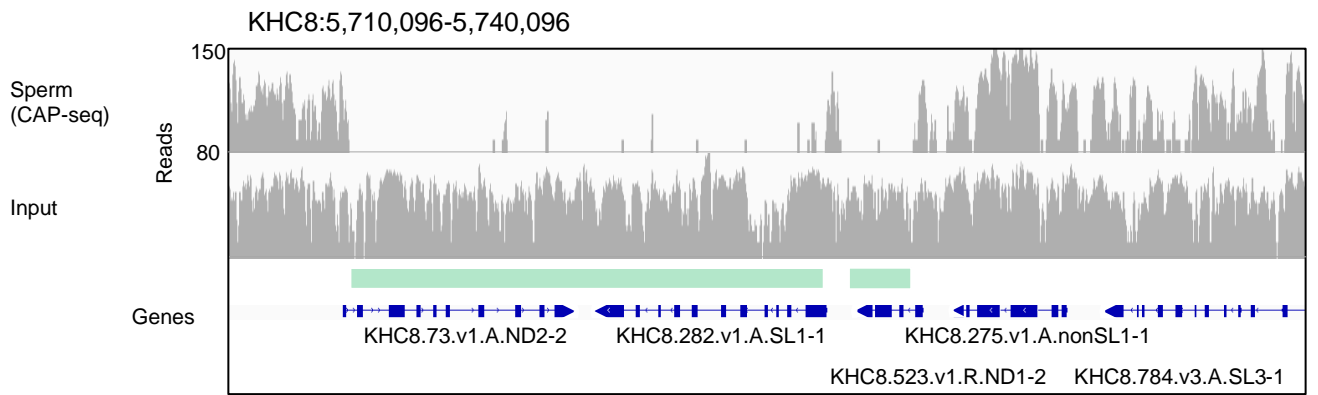

Figure S6.

methyated in sperm / unmethyated in muscle

unmethyated in sperm / methyated in muscle

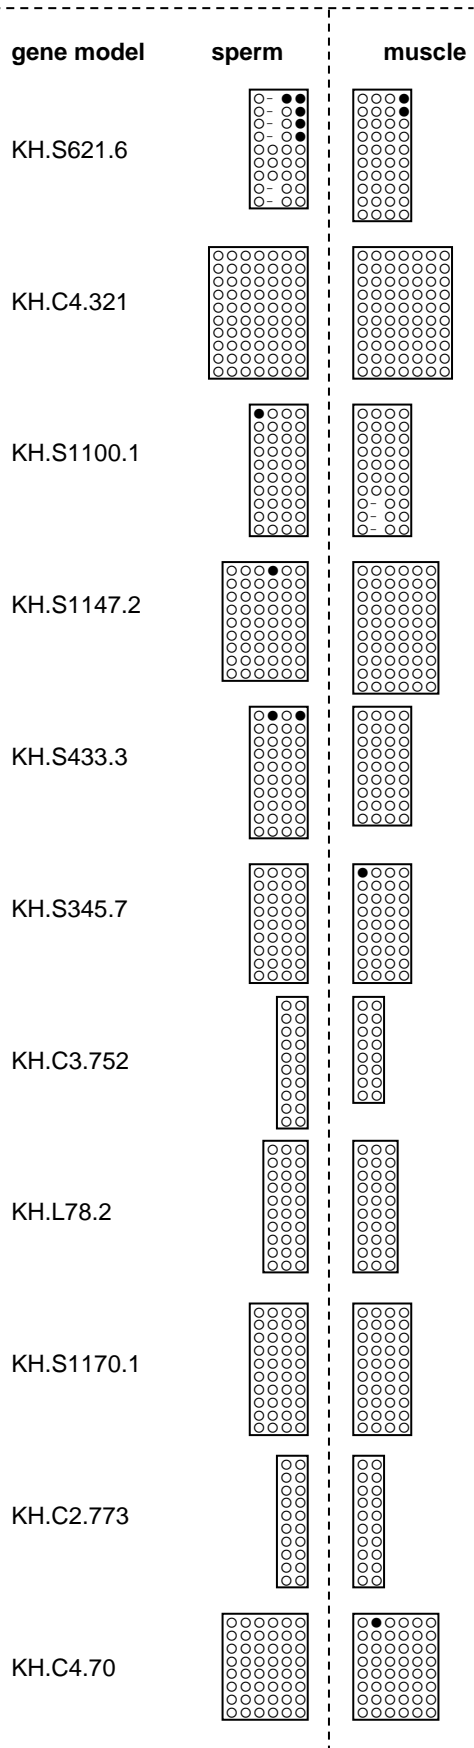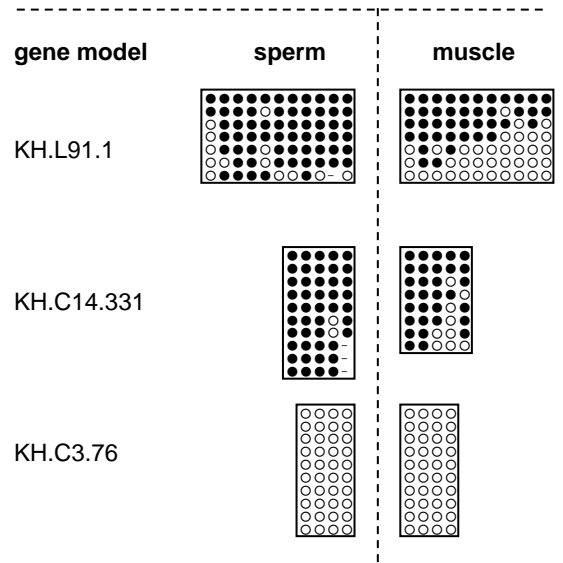

Figure S7.

Endogeneous gene body

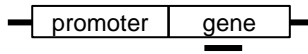

A: *Ci-Epi*

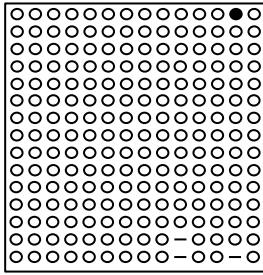

B: *Ci-Tnl*

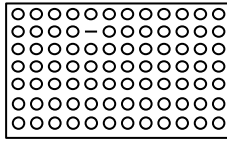

C: *Ci-TPO*

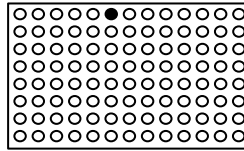

D: *Ci-Ef1a*

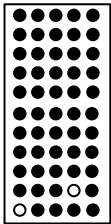

E: *Ci-Trl*

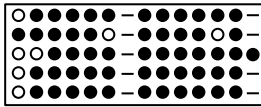

Supplement: 1756-8935-6-38-S1.pdf [file 1756-8935-6-38-S1.pdf]
