# Supplementary material for: Identical sets of methylated and nonmethylated genes in Ciona intestinalis sperm and muscle cells
Source: PubMed Central journal article supplement (PMC3827831; doi:10.1186/1756-8935-6-38), 2013-11-11
Supplement: 1756-8935-6-38-S2.pdf [file 1756-8935-6-38-S2.pdf]

Table S1.

unmethylated in sperm / methylated in muscle

| gene model | repetitive | bisulfite sequencing |
|------------|------------|----------------------|
| KH.L76.9   | yes        |                      |
| KH.C7.531  | yes        |                      |
| KH.S870.1  | yes        |                      |
| KH.C3.546  | yes        |                      |
| KH.L18.68  | yes        |                      |
| KH.C2.416  | yes        |                      |
| KH.S1337.4 | yes        |                      |
| KH.L41.32  | yes        |                      |
| KH.L9.44   | yes        |                      |
| KH.C8.171  | yes        |                      |
| KH.S1352.1 | yes        |                      |
| KH.L20.63  | yes        |                      |
| KH.S1945.2 | yes        |                      |
| KH.S1225.1 | yes        |                      |
| KH.L91.1   | no         | conducted            |
| KH.C14.331 | no         | conducted            |
| KH.C8.666  | yes        |                      |
| KH.S931.2  | yes        |                      |
| KH.S1610.2 | yes        |                      |
| KH.S1777.1 | yes        |                      |
| KH.S2128.1 | yes        |                      |
| KH.C3.76   | no         | conducted            |

methylated in sperm / unmethylated in muscle

| gene model | repetitive | bisulfite sequencing |
|------------|------------|----------------------|
| KH.S621.6  | no         | conducted            |
| KH.C4.321  | no         | conducted            |
| KH.S494.6  | yes        |                      |
| KH.S1100.1 | no         | conducted            |
| KH.S1147.2 | no         | conducted            |
| KH.S433.3  | no         | conducted            |

|            |    |                                   |
|------------|----|-----------------------------------|
| KH.S345.7  | no | conducted                         |
| KH.S345.5  | no | failed to design specific primers |
| KH.C8.831  | no | failed to design specific primers |
| KH.S1847.2 | no | failed to design specific primers |
| KH.C3.752  | no | conducted                         |
| KH.L78.2   | no | conducted                         |
| KH.C4.100  | no | failed to design specific primers |
| KH.S1170.1 | no | conducted                         |
| KH.C2.773  | no | conducted                         |
| KH.S610.3  | no | failed to design specific primers |
| KH.C4.70   | no | conducted                         |

Table S2.

| gene                   | KH      | muscle methylation |      | sperm methylation |   | Methylated (M) /<br>Unmethylated (U) |
|------------------------|---------|--------------------|------|-------------------|---|--------------------------------------|
| Achaete-Scute a like-2 | L9.13   | 0.00               | 0.00 | 0.00              | U |                                      |
| ADMP                   | C2.421  | 0.30               | 0.57 |                   |   |                                      |
| AP-2-like2             | C7.43   | 0.02               | 0.00 | U                 |   |                                      |
| BMP2/4                 | C4.125  | 0.00               | 0.00 | U                 |   |                                      |
| BMP3                   | C12.491 | 0.00               | 0.00 | U                 |   |                                      |
| BMP5/7-like            | C2.336  | 0.02               | 0.00 | U                 |   |                                      |
| Brachyury              | S1404.1 | 0.00               | 0.00 | U                 |   |                                      |
| CAGF9                  | C3.330  | 0.11               | 0.22 |                   |   |                                      |
| Cdx                    | C14.408 | 0.00               | 0.00 | U                 |   |                                      |
| chordin                | C6.145  | 0.40               | 0.67 |                   |   |                                      |
| COE                    | L24.10  | 0.00               | 0.06 | U                 |   |                                      |
| Delta-like             | L155.7  | 0.42               | 0.56 |                   |   |                                      |
| dickkopf               | L20.29  | 0.00               | 0.00 | U                 |   |                                      |
| Dll-B                  | C7.243  | 0.00               | 0.00 | U                 |   |                                      |
| Dll-C                  | C7.770  | 0.00               | 0.00 | U                 |   |                                      |
| DMRT1                  | S544.3  | 0.00               | 0.00 | U                 |   |                                      |
| DUSP1.2.4.5            | C1.1079 | 0.00               | 0.00 | U                 |   |                                      |
| E(spl)/hairy-a         | C1.159  | 0.00               | 0.00 | U                 |   |                                      |
| E(spl)/hairy-b         | C3.312  | 0.00               | 0.00 | U                 |   |                                      |
| E12/E47                | C3.348  | 0.28               | 0.57 |                   |   |                                      |
| ELK                    | C8.247  | 0.00               | 0.00 | U                 |   |                                      |
| Emc                    | C7.692  | 0.00               | 0.00 | U                 |   |                                      |
| Emx                    | L142.14 | 0.00               | 0.00 | U                 |   |                                      |
| Eph1                   | C1.404  | 0.00               | 0.00 | U                 |   |                                      |
| EphrinA-c              | C3.52   | 0.00               | 0.00 | U                 |   |                                      |
| EphrinA-d              | C3.716  | 0.00               | 0.00 | U                 |   |                                      |
| ets/pointed2           | C10.113 | 0.97               | 0.98 | M                 |   |                                      |
| FGF8/17/18             | C5.5    | 0.00               | 0.00 | U                 |   |                                      |
| FGF9/16/20             | C2.125  | 0.00               | 0.00 | U                 |   |                                      |
| Fli/Erg1               | C4.539  | 0.00               | 0.00 | U                 |   |                                      |
| Fli/Erg3               | C10.148 | 0.00               | 0.00 | U                 |   |                                      |
| Fos                    | C11.314 | 0.00               | 0.00 | U                 |   |                                      |

|               |         |      |      |   |  |
|---------------|---------|------|------|---|--|
| FoxA-a        | C11.313 | 0.00 | 0.00 | U |  |
| FoxB          | C4.341  | 0.00 | 0.00 | U |  |
| FoxC          | L57.25  | 0.00 | 0.00 | U |  |
| FoxF          | C3.170  | 0.00 | 0.00 | U |  |
| FoxH-a        | C9.717  | 0.00 | 0.00 | U |  |
| FoxH-b        | L39.1   | 0.00 | 0.00 | U |  |
| FoxP          | C7.207  | 0.01 | 0.00 | U |  |
| Fz4           | C6.162  | 0.00 | 0.13 | U |  |
| GATA-a        | L20.1   | 0.00 | 0.13 | U |  |
| GATA-b        | S696.1  | 0.00 | 0.00 | U |  |
| Hedgehog1     | C8.359  | 0.00 | 0.00 | U |  |
| Hex           | L171.10 | 0.00 | 0.05 | U |  |
| Hlx           | C11.657 | 0.00 | 0.00 | U |  |
| HNF4          | C3.84   | 0.19 | 0.37 |   |  |
| Hox4          | C1.959  | 0.00 | 0.10 | U |  |
| Irx-B         | C11.485 | 0.00 | 0.00 | U |  |
| Irx-C         | C3.67   | 0.00 | 0.00 | U |  |
| Jun           | C5.610  | 0.00 | 0.00 | U |  |
| LAG1-like5    | C3.732  | 0.99 | 1.00 | M |  |
| lefty/antivin | C3.411  | 0.00 | 0.00 | U |  |
| Lhx3          | S215.4  | 0.00 | 0.10 | U |  |
| Lmx           | C9.616  | 0.00 | 0.00 | U |  |
| Meis          | C10.174 | 0.00 | 0.00 | U |  |
| Mesp          | C3.100  | 0.00 | 0.00 | U |  |
| Mist          | C3.308  | 0.00 | 0.00 | U |  |
| Mnx           | L128.12 | 0.00 | 0.00 | U |  |
| Mox           | C8.511  | 0.03 | 0.09 | U |  |
| msxb          | C2.957  | 0.00 | 0.00 | U |  |
| MyoD          | C14.307 | 0.00 | 0.00 | U |  |
| MYTf          | C1.274  | 0.00 | 0.00 | U |  |
| Neurogenin    | C6.129  | 0.00 | 0.00 | U |  |
| NK4           | C8.482  | 0.00 | 0.00 | U |  |
| nodal         | L106.16 | 0.00 | 0.00 | U |  |
| noggin        | C12.562 | 0.00 | 0.00 | U |  |
| NoTrlc        | C1.1116 | 0.00 | 0.00 | U |  |
| Orphan Fox-2  | C5.74   | 0.00 | 0.00 | U |  |

|                    |             |      |      |   |  |
|--------------------|-------------|------|------|---|--|
| Orphan Wnt e       | C6.25       | 0.00 | 0.00 | U |  |
| Otp                | C14.3770.00 | 0.21 | U    |   |  |
| Otx                | C4.84       | 0.00 | 0.11 | U |  |
| Pax3/7             | C10.1500.00 | 0.00 | U    |   |  |
| Pax6               | C9.68       | 0.00 | 0.00 | U |  |
| PPAR               | C8.143      | 0.23 | 0.35 |   |  |
| RAR                | C9.580      | 0.03 | 0.14 | U |  |
| ROR                | C3.17       | 0.01 | 0.10 | U |  |
| sFRP1/5L           | 171.5       | 0.00 | 0.11 | U |  |
| sFRP3/4-b          | C1.520      | 0.00 | 0.00 | U |  |
| Six12              | C3.553      | 0.01 | 0.31 | U |  |
| Six36              | C10.3670.00 | 0.00 | U    |   |  |
| SMYD               | S423.6      | 0.04 | 0.00 | U |  |
| Snail              | C3.751      | 0.00 | 0.00 | U |  |
| SOCS1/2/3/CIS      | L71.9       | 0.00 | 0.00 | U |  |
| SoxB1              | C1.99       | 0.00 | 0.00 | U |  |
| SoxB2              | S164.12     | 0.00 | 0.00 | U |  |
| SoxC               | C7.523      | 0.00 | 0.00 | U |  |
| SoxF               | C7.407      | 0.00 | 0.00 | U |  |
| Tbx2/3             | L96.87      | 0.00 | 0.00 | U |  |
| Tbx6a              | L8.11       | 0.00 | 0.00 | U |  |
| Tbx6b/c/d          | S654.3      | 0.00 | 0.00 | U |  |
| TGFB not assigned1 | C4.547      | 0.00 | 0.00 | U |  |
| Tolloid            | C12.1560.00 | 0.03 | U    |   |  |
| TTF1               | C10.3380.00 | 0.13 | U    |   |  |
| Twist-like-1a/b    | C5.416      | 0.00 | 0.00 | U |  |
| Twist-like-2       | C5.202      | 0.00 | 0.00 | U |  |
| Wnt5               | L152.45     | 0.00 | 0.00 | U |  |
| ZF(C2H2)-2         | C13.22      | 0.01 | 0.00 | U |  |
| ZF(C2H2)-24        | C5.154      | 0.00 | 0.00 | U |  |
| ZF(C2H2)-25        | C1.669      | 0.01 | 0.09 | U |  |
| ZF(C2H2)-33        | C1.777      | 0.00 | 0.00 | U |  |
| ZF(C2H2)-34        | C14.2780.01 | 0.00 | U    |   |  |
| ZFC3H              | C4.182      | 0.00 | 0.00 | U |  |
| ZicL               | S816.1      | 0.00 | 0.00 | U |  |

Table S3.

|                     | <b>Transcriptional variants</b> |                 | <b>Total</b> |
|---------------------|---------------------------------|-----------------|--------------|
|                     | <b>single</b>                   | <b>multiple</b> |              |
| <b>Methylated</b>   | 2,927                           | 1,162           | 4,089        |
| <b>Unmethylated</b> | 2,822                           | 1,176           | 3,998        |
| <b>Total</b>        | 5,749                           | 2,338           | 8,087        |

Table S4.

Primers for bisulfite sequencing

EF1a-F GGGGTTTTTTGTATGATATTTATTA  
EF1a-R AACTCCTCCAACATATTATCACC  
Epi-F AATTTAGTTTATTTTGAGAGTTTGA  
Epi-R AACACAATATAATACAATTCACA  
Trl-F ATTGGTTTTGGTAATTGTATTATTA  
Trl-R ACCTAATCTTTCTCCAACAATC  
TnI-F AAGTGTTATAGGTTTTTTTTT  
TnI-R CAAATTCTTATTTTACTAAC  
TPO-F AGAGAGTAAAAGGTGTTTTATT  
TPO-R AATAAATAAACATCCAAACC  
GFP\_1-F GTATTTATGGTGAGTAAGGG  
GFP\_1-R AAACCTCAAATCAACTTACC  
GFP\_2-F GTTGATTTTGAAGTTTATTTGTATT  
GFP\_2-R CAACTTATATCCCAAATATTACC  
GFP\_3-F GGTATTAAGGTGAATTTTAAGATT  
GFP\_3-R CACCAAACCAACTAATAATAATAAC  
GFP\_4-F GTTATTATTATTAGTTGGTTTGGTGTTAAA  
GFP\_4-R AATACTATTACTTTATTTATAACCATTATA  
KH.L91.1-F GTAAGAGGATATTGGGATTT  
KH.L91.1-R AAACATTCCATTAACAAT  
KH.C14.331-F TTTTGTTATTGAAATGTGGG  
KH.C14.331-R CAATAAACAAATAACTTTATATTCT  
KH.C3.76-F TATAAAAGGGAAAAGGTTTT  
KH.C3.76-R TAAACACCACTAACCCATAA  
KH.S621.6-F ATAGTAGGTTATTTATTGTGATTAG  
KH.S621.6-R AACCTTAAATATTTTCTTAAATATA  
KH.C4.321-F ATTTGAAATTAGATGTGGAA  
KH.C4.321-R TCACCTCTAACTCTAACCAA  
KH.S1100.1-F ATGAATTGGATATATTTGAAGA  
KH.S1100.1-R ATTACATACAATATTTACCCA  
KH.S1147.2-F TTTTTTGAGGAAGTTTTTTTT  
KH.S1147.2-R TCATAACCTAATCCAAACAT

KH.S433.3-F TATTAATTGAGTGGTTTTGT  
KH.S433.3-R AATCCAAAAAATAAAATTC  
KH.S345.7-F GTAAGGGATATAATTGTTAGTT  
KH.S345.7-R TATTTATAAACAAAAACATCA  
KH.C3.752-F TATTTAAGGTTGGGTGATTT  
KH.C3.752-R AACACAATTTTATTTTCAA  
KH.L78.2-F AGGTTTATTTTTTTATATGG  
KH.L78.2-R TTAACCTCTTCACAACTAA  
KH.S1170.1-F TTTTTTAGGTAAATTGTTGA  
KH.S1170.1-R ACCAAAAAATAAATACCTC  
KH.C2.773-F ATTAATAGGGTTTTTTTTGA  
KH.C2.773-R AAACATTACAACACCTAAAA  
KH.C4.70-F GAAAGGTTGGTGTAGTTTA  
KH.C4.70-R AAAAATCCAATTCATAAAAA

#### Primers for RT-qPCR

DNMT1-F GATGGTAAGAAGCCCCGAAG  
DNMT1-R CCCGACATTTTCATCGAACTT  
DNMT3I-F CGCAGCAAAAAGGTTATCGT  
DNMT3I-R TGGGGTTGGTAAGTAGATATTGC  
DNMT3II-F CAGATCAGGAAAAGCCCTCA  
DNMT3II-R TGTATAACCCCTTCGGCAAG  
GAPDH-F AAGGTTTTATGATAATTGTGTA  
GAPDH-R AAAATACTAACTTCTCCAAAC
